# Supplementary material for: One-step hydrothermal synthesis of Nb doped brookite TiO2 nanosheets with enhanced lithium-ion intercalation properties
Source: Royal Society of Chemistry journal article supplement (doi:10.1039/c5ta04870b), 2015-01-01
Supplement: c5ta04870b1.pdf [file c5ta04870b1.pdf]

## Supporting Information

### One-step hydrothermal synthesis of Nb doped brookite TiO<sub>2</sub> nanosheets 5 with enhanced lithium-ion intercalation properties †

Yubin Liu,<sup>a, b</sup> Mingying Liu,<sup>a, b</sup> Tongbin Lan,<sup>a, b</sup> Jie Dou<sup>a, b</sup> and Mingdeng Wei<sup>\*a, b</sup>

<sup>a</sup> State Key Laboratory of Photocatalysis on Energy and Environment, Fuzhou University, Fuzhou, Fujian  
350002, China

10 <sup>b</sup> Institute of Advanced Energy Materials, Fuzhou University, Fuzhou, Fujian 350002, China  
E-mail: wei-mingdeng@fzu.edu.cn

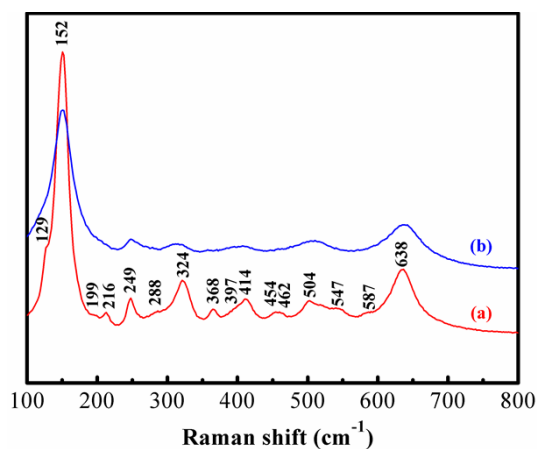

Fig. S1 Raman spectra of (a) TO and (b) NTO.

20

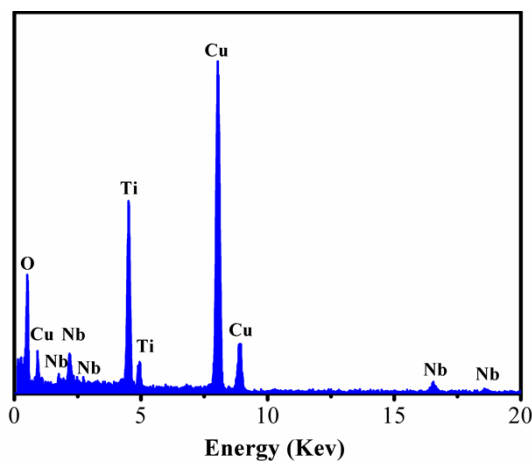

Fig. S2 EDX spectra of NTO.

30

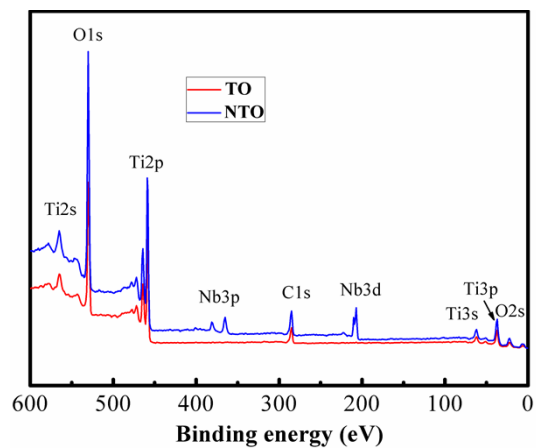

**Fig. S3** XPS survey spectra of TO and NTO.

5

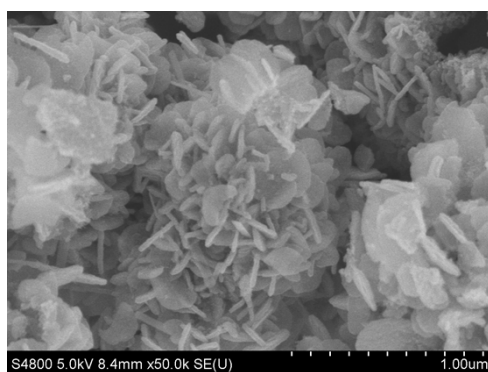

**Fig. S4** SEM image of NTO-24.

10

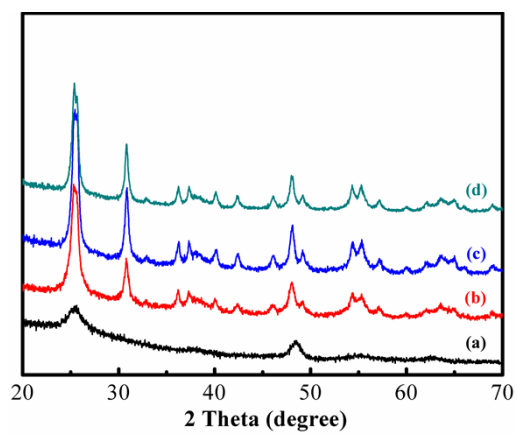

**Fig. S5** XRD patterns of (a) TO-3, (b) TO-6, (c) TO and (d) TO-24.

15

20

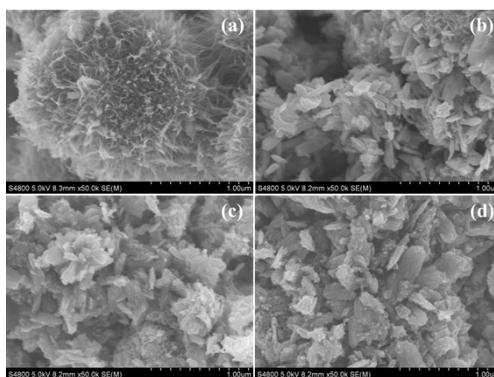

**Fig. S6** SEM images of (a) TO-3, (b) TO-6, (c) TO and (d) TO-24.

5

10

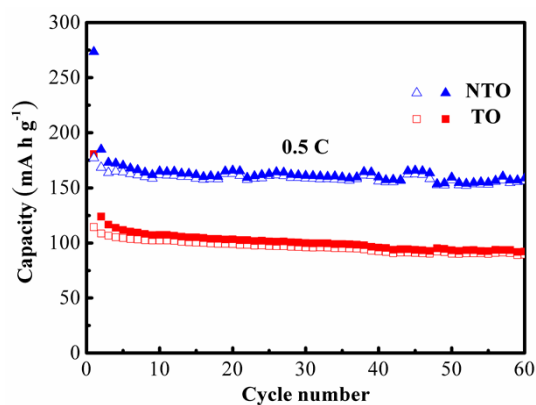

**Fig. S7** Cycling performance of TO and NTO at 0.5 C.

15

20

Table S1 Impedance parameters calculated form equivalent circuit model

| sample | $R_s/\Omega$ | $R_{ct}/\Omega$ |
|--------|--------------|-----------------|
| TO     | 9.5          | 161.9           |
| NTO    | 9.6          | 52.4            |

25

30

35

Samples with different Nb contents (0, 0.05, 0.1, 0.15 g of niobium oxalate hydrate, respectively) were prepared as shown in Experimental, and the samples were denoted as TO, NTO-0.05, NTO-0.1 and NTO-0.15, respectively. The corresponding results and discussion are list as follows.

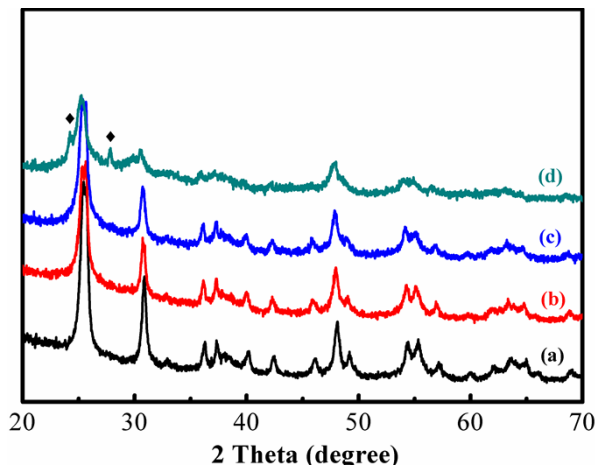

Fig. S8 XRD patterns of (a) TO, (b) NTO-0.05, (c) NTO-0.1 and (d) NTO-0.15.

As shown in Fig. S8, all the diffraction peaks of TO, NTO-0.05 and NTO-0.1 can be indexed to a pure brookite  $\text{TiO}_2$  (JCPDS 29-1360). In addition, it can be clearly found that the diffraction peaks intensity decreased and the diffraction peaks of samples shifted to lower  $2\theta$  values with increasing Nb content. However, XRD pattern of NTO-0.15 shows some additional diffraction peaks (shown by quadrangle), which can be indexed to niobium compounds. Furubayashi et al [1] reported that it is difficult to achieve doping content of Nb above 20% in anatase  $\text{TiO}_2$ .

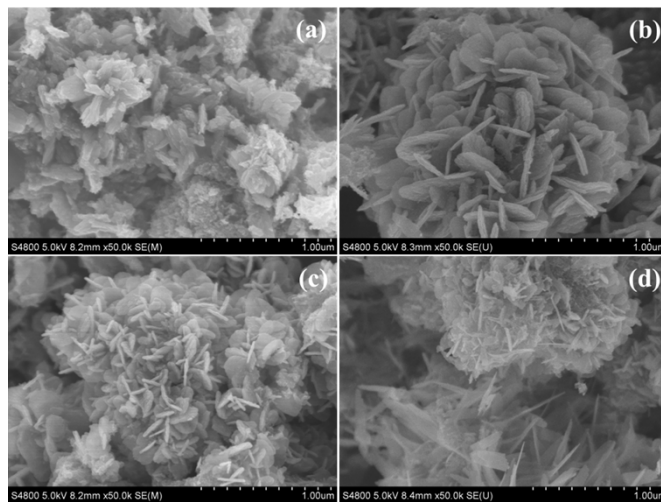

Fig. S9 SEM images of (a) TO, (b) NTO-0.05, (c) NTO-0.1 and (d) NTO-0.15.

Fig. S9 shows SEM images of TO, NTO-0.05, NTO-0.1 and NTO-0.15. Undoped TO exhibited nanorod-like morphology. Both NTO-0.05 and NTO-0.1 exhibited nanosheet-like morphology. However, it can be found that some nanobelts in impure NTO-0.15 (shown in Fig. S9d), which might be attributed to niobium compounds.

According to above results, we believe that Nb doped brookite  $\text{TiO}_2$  with different Nb contents can be prepared in the present work. With further increasing Nb source, impure phase in Nb doped brookite  $\text{TiO}_2$  was found.

[1] Y. Furubayashi, T. Hitosugi, Y. Yamamoto, K. Inaba, G. Kinoda, Y. Hirose, T. Shimada and T. Hasegawa, Appl. Phys. Lett., 2005, 86, 252120.
